# Supplementary material for: Construction of structural diversity and fine-tuned porosity in acylamide MOFs by a synthetic approach
Source: Royal Society of Chemistry journal article supplement (doi:10.1039/c5nj02634b), 2015-12-02
Supplement: c5nj02634b1.pdf [file c5nj02634b1.pdf]

## Construction of structural diversity and fine-tuned porosity in acylamide MOFs by synthetical approach

Wan-Ting Yao, Ming-Biao Luo, Xue-Feng Feng\*, Pan-Pan Meng, Le-Le Gong, and Feng Luo\*

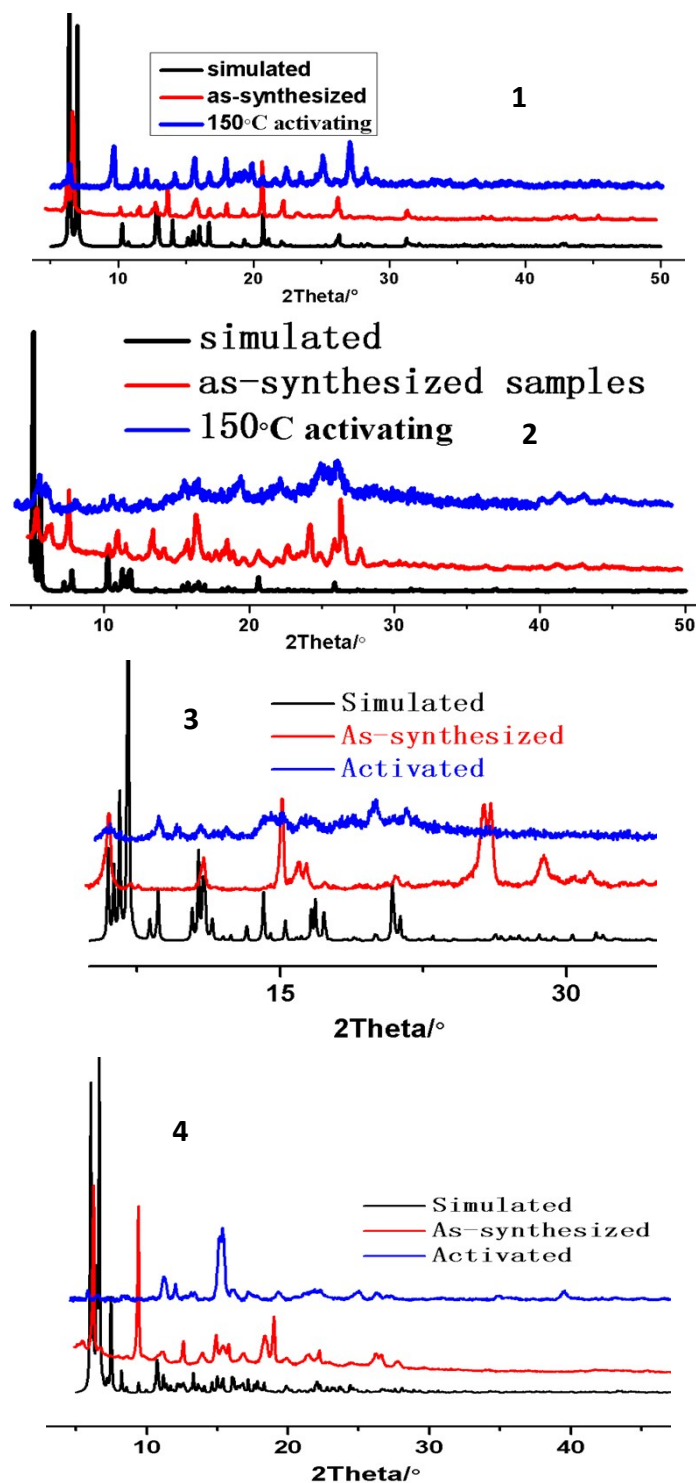

**Fig. S1** The PXRD patterns simulated from single crystal data, of as-synthesized bulk samples and

after activating at 150°C for polymers 1-4, respectively.

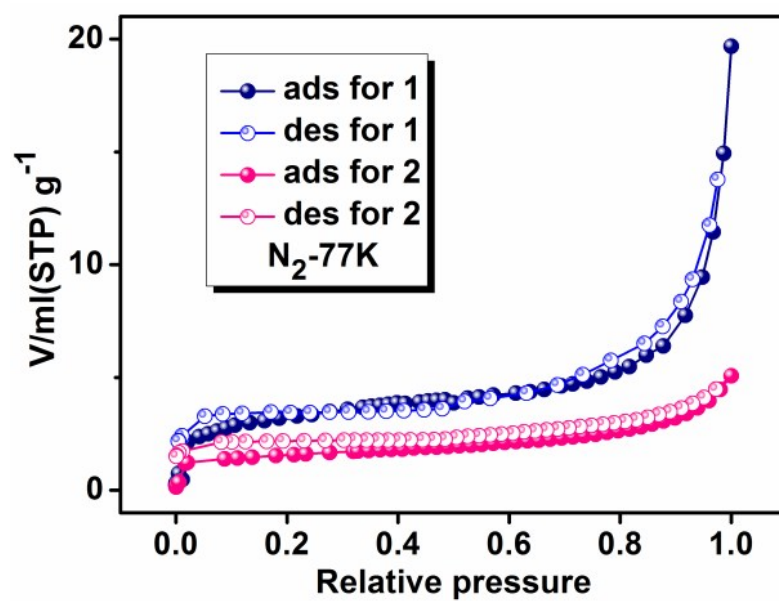

Fig. S2 The N<sub>2</sub> adsorption isotherms of 1 and 2 at 77K.
